# Supplementary material
Source: publisher figshare collection journal article supplement (https://sage.figshare.com/ndownloader/files/13765196)
Supplement: Supplementary file 1 [file 13765196]

## APPENDIX - SUPPLEMENTARY MATERIAL

**Table 1. Overall Assessment of Quality by ROBINS-I**

|              | Confounding | Selection of participants | Classification of interventions | Deviations from intended interventions | Missing Data | Measurements of outcomes | Selection of Reported Results | Overall ROB Judgement |
|--------------|-------------|---------------------------|---------------------------------|----------------------------------------|--------------|--------------------------|-------------------------------|-----------------------|
| Miller 2018  | Low         | Moderate                  | Low                             | Low                                    | Low          | Low                      | Low                           | Low                   |
| Jones 2017   | Low         | Low                       | Low                             | Low                                    | Moderate     | Low                      | Low                           | Low                   |
| Shawyer 2013 | Low         | Low                       | Low                             | Low                                    | Low          | Low                      | Low                           | Low                   |
| Shemesh 2009 | Low         | Serious                   | Serious                         | Serious                                | Serious      | Moderate                 | Moderate                      | Serious               |
| Davies 2017  | Moderate    | Moderate                  | Moderate                        | Moderate                               | Serious      | Serious                  | Moderate                      | Moderate              |
| Aitken 2014  | Low         | Low                       | Moderate                        | Moderate                               | Moderate     | Serious                  | Moderate                      | Moderate              |
| Kian 2008    | Low         | Low                       | Low                             | Moderate                               | Moderate     | Moderate                 | Moderate                      | Moderate              |
| Rajan 2003   | Low         | Low                       | Low                             | Serious                                | Low          | Low                      | Low                           | Low                   |

**Table 2. Cochrane Risk of Bias**

|              | Selection bias | Reporting bias | Performance bias | Detection bias | Attrition bias | Other bias |
|--------------|----------------|----------------|------------------|----------------|----------------|------------|
| Gogna 2016   | Unclear        | Unclear        | Unclear          | Unclear        | Unclear        | Unclear    |
| Rajan 2015   | Low            | Unclear        | Unclear          | High           | Low            | Low        |
| Shemesh 2008 | Low            | Low            | Unclear          | Low            | Low            | Low        |
